# Supplementary material for: Application of Antisolvent Precipitation Method for Formulating Excipient-Free Nanoparticles of Psychotropic Drugs
Source: MDPI journal article supplement (doi:10.3390/pharmaceutics14040819), 2022-04-08
Supplement: s1 [file s1]

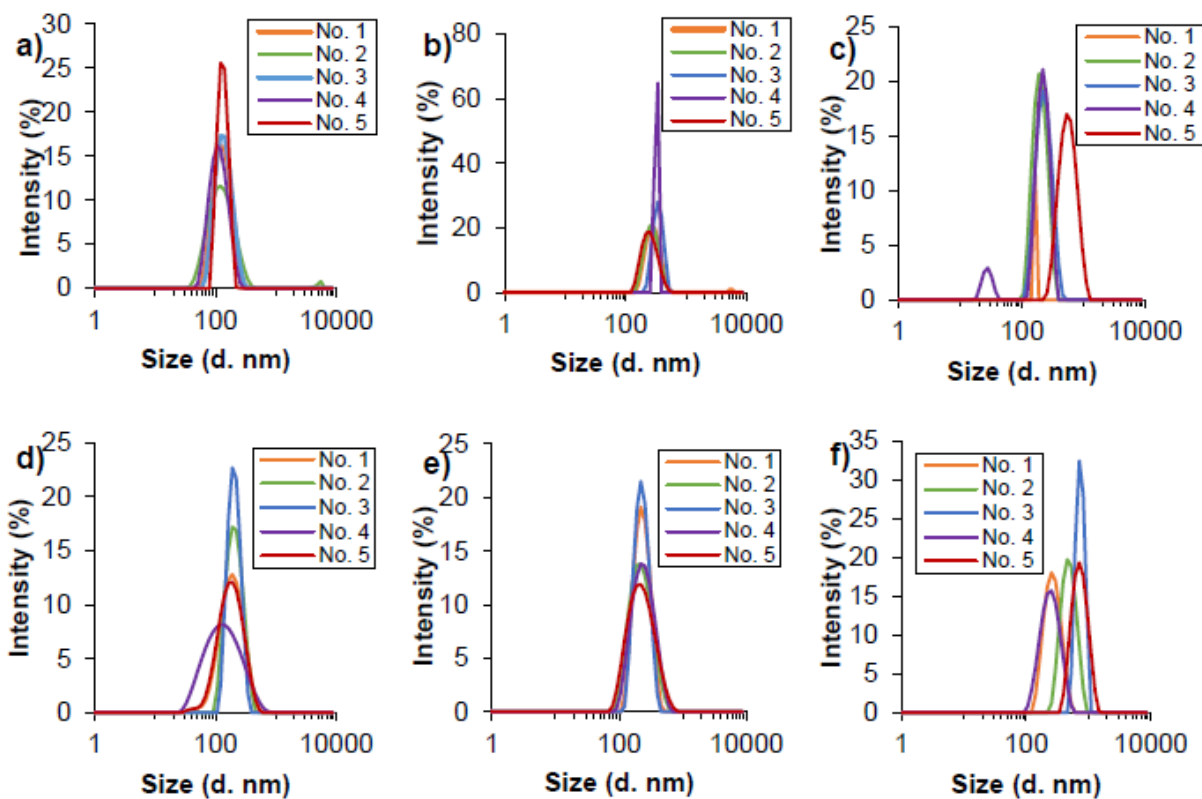

**Figure S1.** Representative size distributions of particles of (a) CUR, (b) COU, (c) NOR, (d) PRO, (e) AMIa and (f) AMIb. The preparation protocols employed are indicated.
